# Supplementary material
Source: publisher figshare collection journal article supplement (https://tandf.figshare.com/ndownloader/files/12285476)
Supplement: Supplementary file 1 [file 12285476]

Total Patients

**n=2100**

Patients with no treatment history of statins and/or other lipid-lowering drugs

**n=2012**

Patients enrolled

**n=1977**

with thyroid disease; n=16

with heart failure or cardiomyopathies; n=9

with renal dysfunction; n=6

with hepatic failure; n=2

with acute infectious/ inflammatory conditions; n=2

CAD group

**n=1151**

Non-CAD group

**n=826**
